# Supplementary material for: Ir(iv) and Ir(iii) in situ transition promotes ROS generation for eradicating multidrug-resistant bacterial infection
Source: Royal Society of Chemistry journal article supplement (doi:10.1039/d3bm00579h), 2023-01-01
Supplement: d3bm00579h1.pdf [file d3bm00579h1.pdf]

## Supporting Information

### Ir(IV) and Ir(III) in-situ transition promotes ROS generation for eradicating multidrug-resistant bacterial infection

*Xufeng Zhu<sup>a,b,c</sup>, Yonglan Yang<sup>b</sup>, Xu Chen<sup>b</sup>, Gang Ye<sup>b\*</sup>, Jie Liu<sup>b\*</sup>, Yanan Liu<sup>a\*</sup>*

*a, Shenzhen Longhua Maternity and Child Healthcare Hospital, Shenzhen, 518110, China.*

*b, College of Chemistry and Materials, The First Affiliated Hospital, Jinan University, Guangzhou 511436, China.*

*c, The Marine Biomedical Research Institute, Guangdong Medical University, The Marine Biomedical Research Institute of Guangdong Zhanjiang, Zhanjiang, Guangdong, 524023, China*

*\*Corresponding author: E-mail: dr.yegang@qq.com (G. Ye), tliuliu@jnu.edu.cn (J. Liu), E-mail: yananliu0321@163.com.*

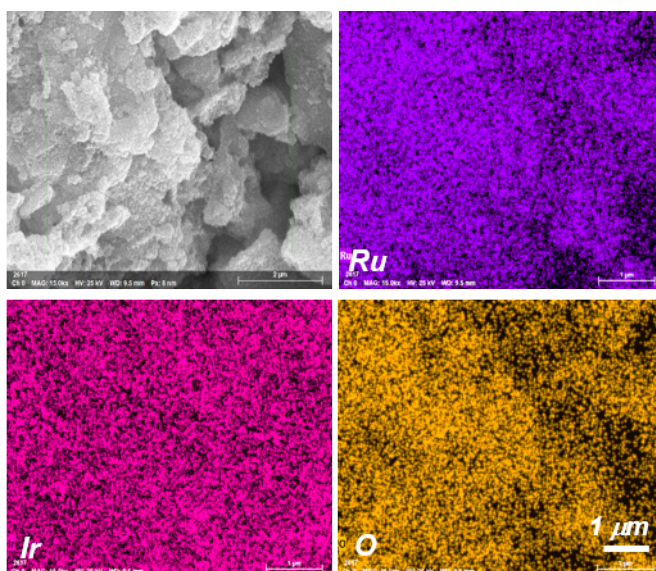

**Figure S1.** SEM picture of IrRuO<sub>x</sub> NPs and its EDS element map.

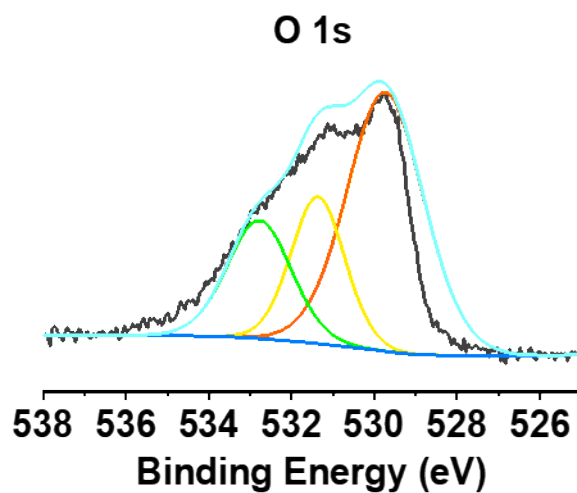

**Figure S2.** The XPS spectrum shows the 1s energy levels of O.

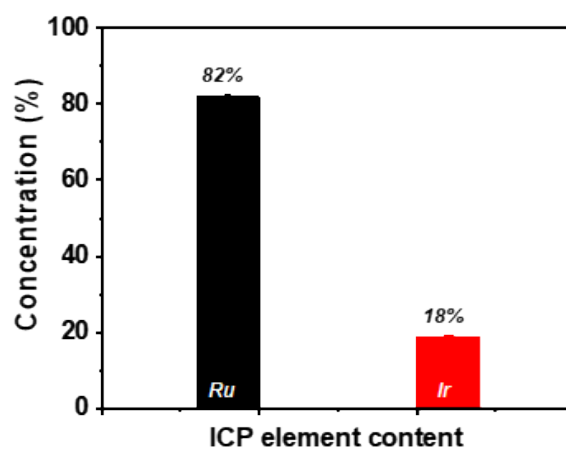

**Figure S3.** The element distribution ratio of IrRuO<sub>x</sub> NPs by ICP-MS.

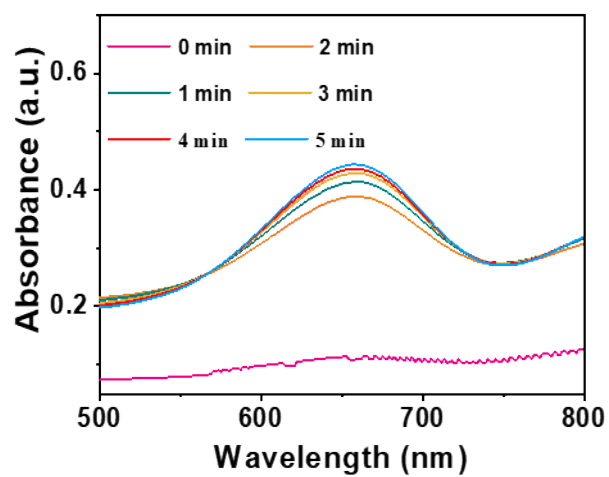

**Figure S4.** UV absorption spectra of IrRuO<sub>x</sub>-PEG at different time.

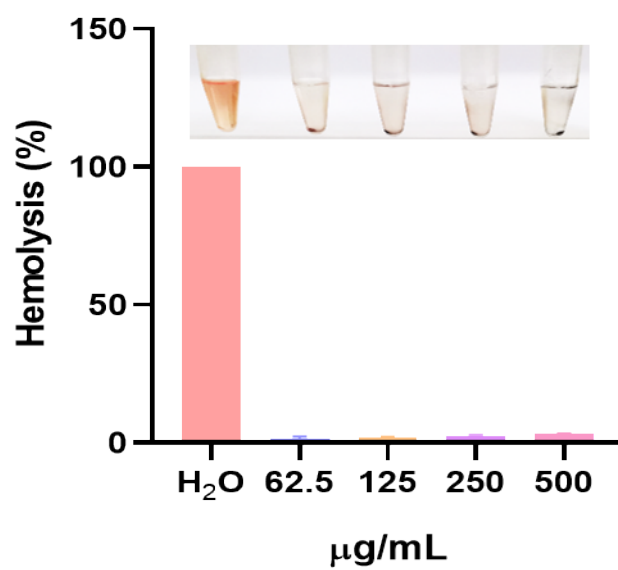

**Figure S5.** Hemolysis rate of IrRuO<sub>x</sub>-PEG at different concentrations.

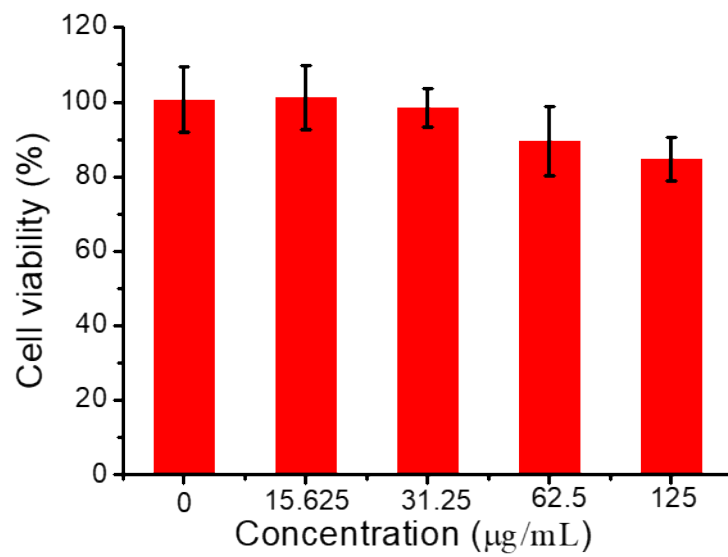

**Figure S6.** Cytotoxicity of different concentrations of IrRuO<sub>x</sub>-PEG to NIH3T3.

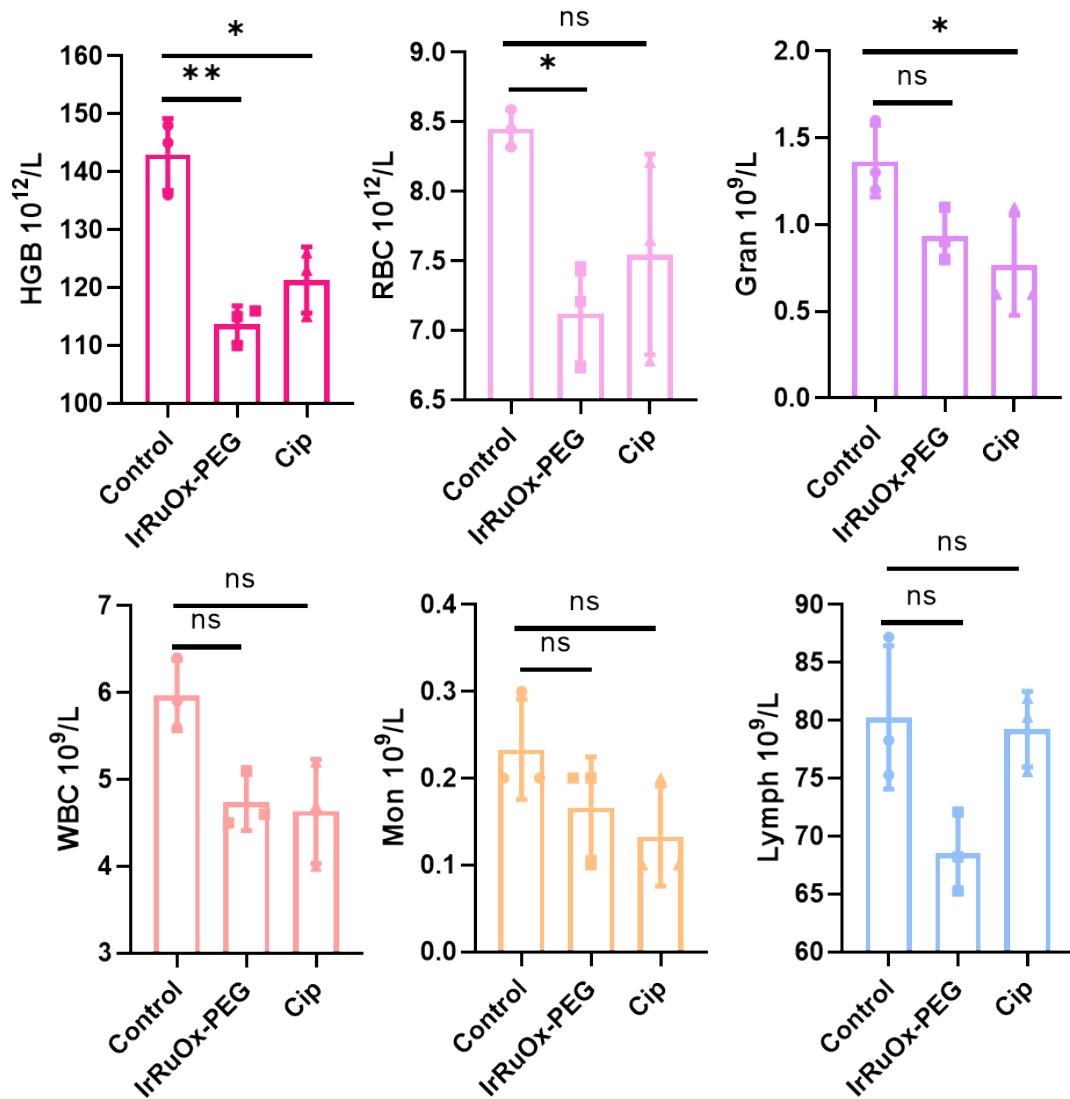

**Figure S7.** Changes in white blood cell (WBC), monocyte (MON), lymphocyte (LY), Hemoglobin (HGB) and red blood cell (RBC) counts in *MRSA*-infected mice after treatment.

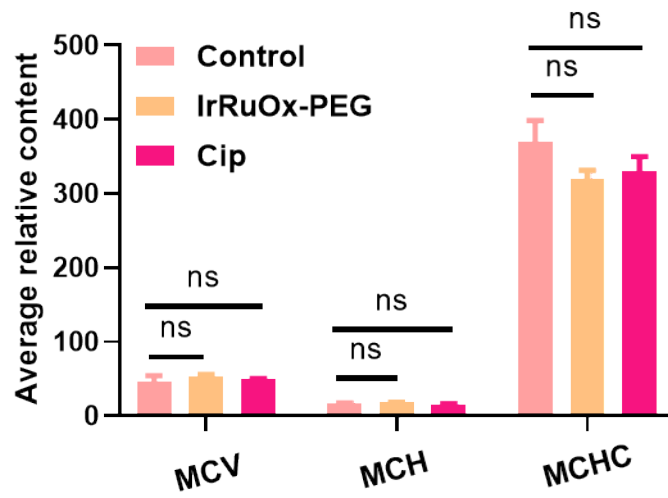

**Figure S8.** The average red blood cell volume (MCV), average red blood cell hemoglobin content (MCH) and average red blood cell hemoglobin concentration (MCHC) of MRSA-infected mice after treatment. (n = 6, \*P < 0.05, \*\*P < 0.01, and \*\*\*P < 0.001).
